# Supplementary material for: Quantitation and correlation of selected nutrients in the soil, foliar, stem and root of edible weed, Talinum Paniculatum around University of KwaZulu-Natal, Pietermaritzburg, South Africa
Source: Research Square preprint supplement (doi:10.21203/rs.3.rs-3877772/v1), 2024-01-22
Supplement: Supplementary file 1 [file 4949f2a688ea83ad418eb690.docx]

**Quantitation and correlation of selected nutrients in the soil, foliar, stem and root of edible weed, *Talinum Paniculatum* around University of KwaZulu-Natal, Pietermaritzburg, South Africa**

George O. Achieng’1,4, Reinner O. Omondi2*, Victor O. Shikuku3,4, George M. Okowa4

1Department of Chemistry, Maseno University, P.O. Box 333-40105, Maseno, Kenya.

2Department of Chemistry, University of Cape Town, Rondebosch, 7701, South Africa.

3Department of Physical Sciences, Kaimosi Friends University, P.O. Box 385-50309, Kaimosi, Kenya.

4CSI International Limited, Nairobi, P.O. Box 47846-00100, Nairobi, Kenya.

**Appendix 1:** Certified Reference Material (CRM) for Soil

|  | **Element (mg/kg)** | | | | | | | | |
| --- | --- | --- | --- | --- | --- | --- | --- | --- | --- |
|  | **Fe** | **Cu** | **Mn** | **Zn** | **Pb** | **Ca** | **Na** | **Mg** | **K** |
| Concentration | 15.33 | 12.33 | 27.67 | 9.16 | 0.37 | 116.00 | 33.30 | 43.23 | 84.40 |
| Upper Limit | 16 | 15 | 30 | 15 | 2 | 120 | 46 | 58 | 108.54 |
| Lower Limit | 14 | 11 | 25 | 5 | 0.1 | 80 | 30 | 44 | 84.12 |

**Appendix 2:** Certified Reference Material (CRM)-Vegetable Puree

**Appendix 2a:** Quality ControlforMagnesium

| Magnesium (mg/g) | | | |
| --- | --- | --- | --- |
| Lower limit | True value | Results | Upper limit |
| 27.99 | 34.99 | 26.93 | 41.99 |
| 27.99 | 34.99 | 26.79 | 41.99 |
| 27.99 | 34.99 | 30.02 | 41.99 |
| 27.99 | 34.99 | 28.79 | 41.99 |
| 27.99 | 34.99 | 30.73 | 41.99 |
| 27.99 | 34.99 | 27.97 | 41.99 |
| 27.99 | 34.99 | 30.09 | 41.99 |
| 27.99 | 34.99 | 30.68 | 41.99 |
| 27.99 | 34.99 | 29.56 | 41.99 |

**Appendix 2b:** Quality Control for Potassium

| Potassium (mg/g) | | | |
| --- | --- | --- | --- |
| Lower limit | True value | Results | Upper limit |
| 11.99 | 14.98 | 14.43 | 17.98 |
| 11.99 | 14.98 | 13.93 | 17.98 |
| 11.99 | 14.98 | 15.41 | 17.98 |
| 11.99 | 14.98 | 13.93 | 17.98 |
| 11.99 | 14.98 | 13.76 | 17.98 |
| 11.99 | 14.98 | 14.04 | 17.98 |
| 11.99 | 14.98 | 14.67 | 17.98 |
| 11.99 | 14.98 | 15.01 | 17.98 |
| 11.99 | 14.98 | 14.92 | 17.98 |

**Appendix 2c:** Quality Control for Sodium

| Sodium (mg/g) | | | |
| --- | --- | --- | --- |
| Lower limit | True value | Results | Upper limit |
| 20.75364 | 25.94205 | 30.02 | 31.13046 |
| 20.75364 | 25.94205 | 27.45 | 31.13046 |
| 20.75364 | 25.94205 | 28.35 | 31.13046 |
| 20.75364 | 25.94205 | 31.16 | 31.13046 |
| 20.75364 | 25.94205 | 29.47 | 31.13046 |
| 20.75364 | 25.94205 | 27.56 | 31.13046 |
| 20.75364 | 25.94205 | 28.45 | 31.13046 |
| 20.75364 | 25.94205 | 26.43 | 31.13046 |
| 20.75364 | 25.94205 | 27.79 | 31.13046 |

**Appendix 2d:** Quality ControlforIron

| Iron (mg/g) | | | |
| --- | --- | --- | --- |
| Lower limit | True value | Results | Upper limit |
| 0.663 | 1.104 | 1.426 | 1.546 |
| 0.663 | 1.104 | 1.394 | 1.546 |
| 0.663 | 1.104 | 1.235 | 1.546 |
| 0.663 | 1.104 | 1.1146 | 1.546 |
| 0.663 | 1.104 | 1.463 | 1.546 |
| 0.663 | 1.104 | 0.778 | 1.546 |
| 0.663 | 1.104 | 0.898 | 1.546 |
| 0.663 | 1.104 | 0.984 | 1.546 |
| 0.663 | 1.104 | 1.189 | 1.546 |

**Appendix 2e:** Quality Controlfor Manganese

| Manganese (mg/g) | | | |
| --- | --- | --- | --- |
| Lower limit | True value | Results | Upper limit |
| 0.948 | 1.398 | 1.245 | 1.849 |
| 0.948 | 1.398 | 1.313 | 1.849 |
| 0.948 | 1.398 | 0.998 | 1.849 |
| 0.948 | 1.398 | 1.435 | 1.849 |
| 0.948 | 1.398 | 1.289 | 1.849 |
| 0.948 | 1.398 | 1.378 | 1.849 |
| 0.948 | 1.398 | 1.547 | 1.849 |
| 0.948 | 1.398 | 1.326 | 1.849 |
| 0.948 | 1.398 | 1.289 | 1.849 |

**Appendix 2f:** Quality Controlfor Lead

| Lead (mg/g) | | | |
| --- | --- | --- | --- |
| Lower limit | True value | Results | Upper limit |
| 0.78 | 1.3 | 1.526316 | 1.82 |
| 0.78 | 1.3 | 1.3457 | 1.82 |
| 0.78 | 1.3 | 1.54346 | 1.82 |
| 0.78 | 1.3 | 1.45789 | 1.82 |
| 0.78 | 1.3 | 1.56432 | 1.82 |
| 0.78 | 1.3 | 1.21346 | 1.82 |
| 0.78 | 1.3 | 1.3467 | 1.82 |
| 0.78 | 1.3 | 1.292356 | 1.82 |
| 0.78 | 1.3 | 1.37645 | 1.82 |

**Appendix 2g:** Quality Controlfor Zinc

| Zinc (mg/g) | | | |
| --- | --- | --- | --- |
| Lower limit | True value | Results | Upper limit |
| 0.498 | 0.805 | 0.794349 | 1.111 |
| 0.498 | 0.805 | 0.810047 | 1.111 |
| 0.498 | 0.805 | 0.810047 | 1.111 |
| 0.498 | 0.805 | 0.828885 | 1.111 |
| 0.498 | 0.805 | 0.833595 | 1.111 |
| 0.498 | 0.805 | 0.794349 | 1.111 |
| 0.498 | 0.805 | 0.77865 | 1.111 |
| 0.498 | 0.805 | 0.827316 | 1.111 |
| 0.498 | 0.805 | 0.806907 | 1.111 |

**Appendix 2h:** Quality Controlfor Copper

| Copper (mg/g) | | | |
| --- | --- | --- | --- |
| Lower limit | True value | Results | Upper limit |
| 0.2 | 0.297 | 0.251101 | 0.394 |
| 0.2 | 0.297 | 0.299559 | 0.394 |
| 0.2 | 0.297 | 0.38326 | 0.394 |
| 0.2 | 0.297 | 0.339207 | 0.394 |
| 0.2 | 0.297 | 0.317181 | 0.394 |
| 0.2 | 0.297 | 0.339207 | 0.394 |
| 0.2 | 0.297 | 0.361233 | 0.394 |
| 0.2 | 0.297 | 0.339207 | 0.394 |
| 0.2 | 0.297 | 0.339207 | 0.394 |

**Appendix 2i:** Quality Controlfor Calcium

| Calcium (mg/g) | | | |
| --- | --- | --- | --- |
| Lower limit | True value | Results | Upper limit |
| 7.982 | 9.977 | 11.54 | 11.97 |
| 7.982 | 9.977 | 10.97 | 11.97 |
| 7.982 | 9.977 | 8.97 | 11.97 |
| 7.982 | 9.977 | 9.02 | 11.97 |
| 7.982 | 9.977 | 11.45 | 11.97 |
| 7.982 | 9.977 | 12.67 | 11.97 |
| 7.982 | 9.977 | 11.77 | 11.97 |
| 7.982 | 9.977 | 9.48 | 11.97 |
| 7.982 | 9.977 | 13.59 | 11.97 |

**Appendix 3:** Trend Curves for the quality control for analyzed parameters using PT

**Appendix 3a:** Trend Curve for Calcium

**Appendix 3b:** Trend Curve for Copper

**Appendix 3c:** Trend Curve for Zinc

**Appendix 3d:** Trend Curve for Lead

**Appendix 3e:** Trend Curve for Manganese

**Appendix 3f:** Trend Curve for Iron

**Appendix 3g:** Trend Curve for Sodium

**Appendix 3h:** Trend Curve for Potassium

**Appendix 3i:** Trend Curve for Magnesium

**Appendix 3j:** Trend Curve for pH
